# Supplementary material
Source: PubMed Central journal article supplement (PMC11028188)
Supplement: 262_2018_2179_MOESM1_ESM.pdf [file 262_2018_2179_MOESM1_ESM.pdf]

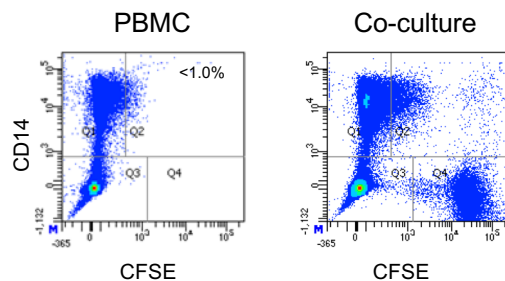

**Supplemental Figure 1.** Gating of monocytes. PBMC or Co-culture (PBMC + HCC1419) were incubated for 4 hours and then stained for surface markers. CD14 monocytes are on the y-axis while CFSE labeled HCC1419 are on the X-axis. The gate that determined phagocytosis was based on the PBMC population that was not exposed to CFSE labeled tumor cells.

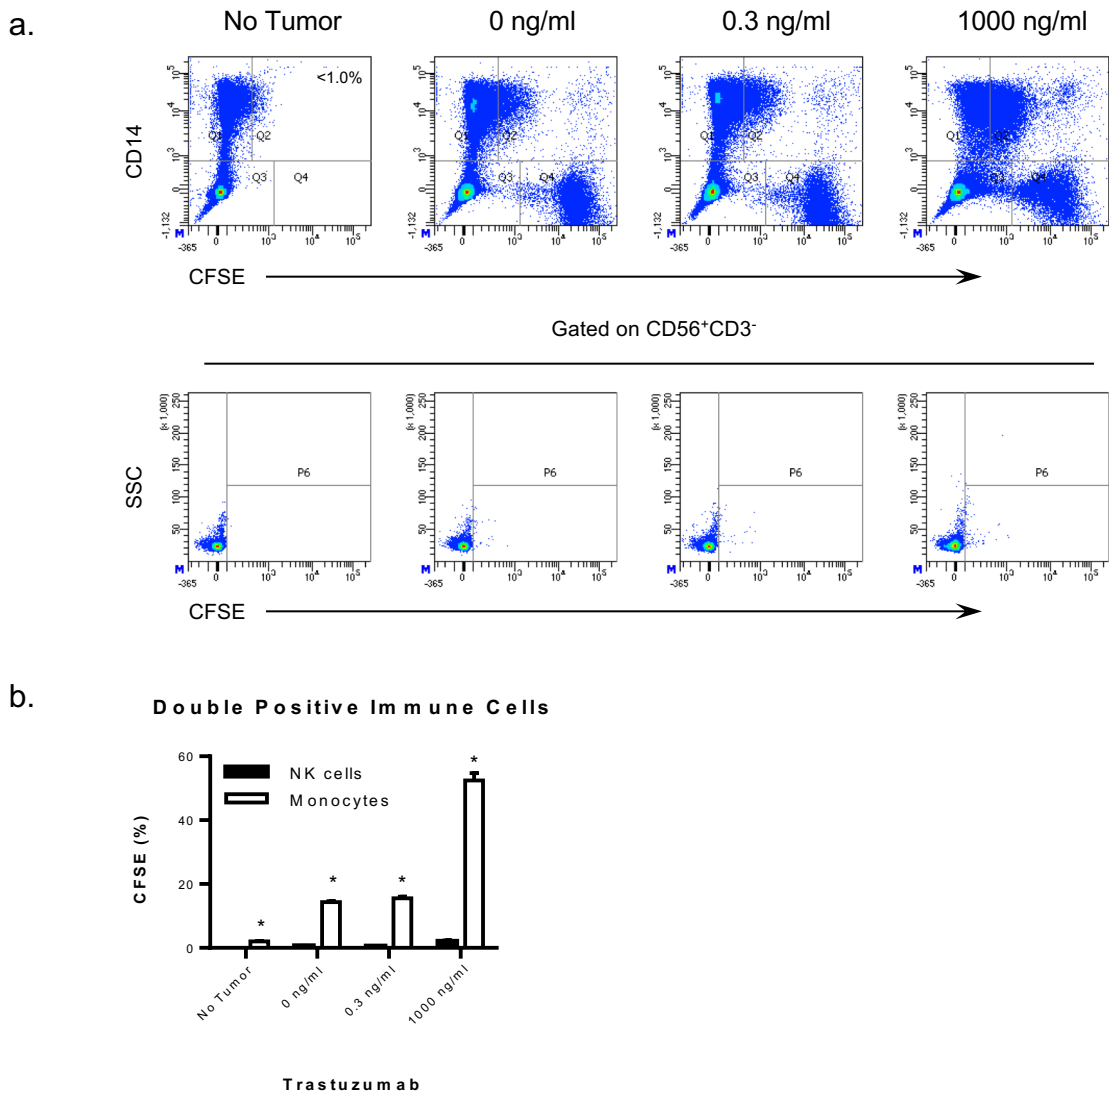

**Supplemental Figure 2.** Monocytes take up CFSE labeled tumor significantly better than NK cells. PBMC and HCC1419 were co-cultured with various concentrations of trastuzumab. **a.** Gating strategy for CD14 monocytes and CD56<sup>+</sup>CD3<sup>-</sup> NK cells that became CFSE positive. **b.** Numerical comparison of CFSE positive NK cells and monocytes. T tests were used to compare CFSE levels in monocytes and NK cells under different conditions. \* indicates statistical significance of P<0.001.

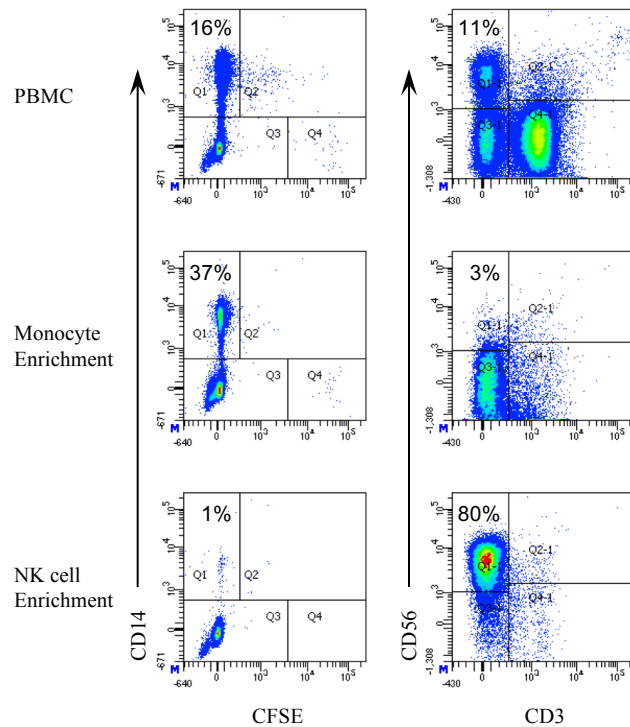

**Supplemental Figure 3.** Enrichment of monocytes and NK cells by negative selection. Flow cytometry profiles of monocyte and NK cell enrichment compared with PBMC.

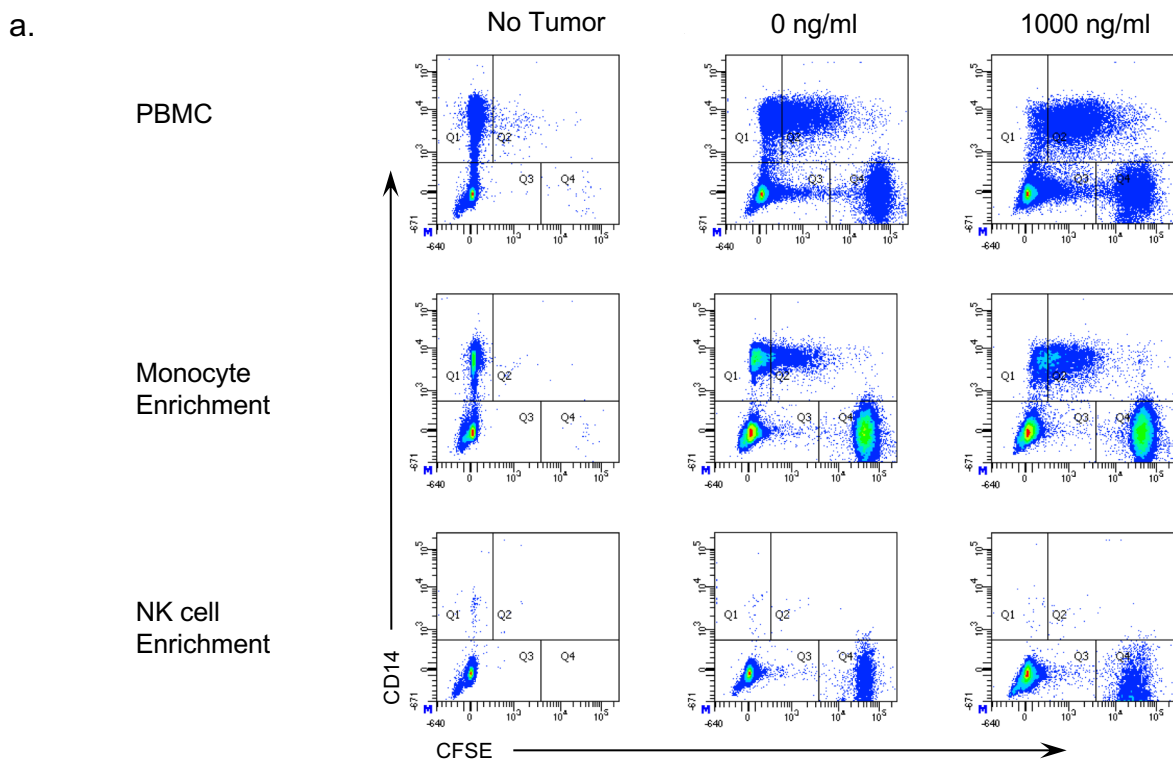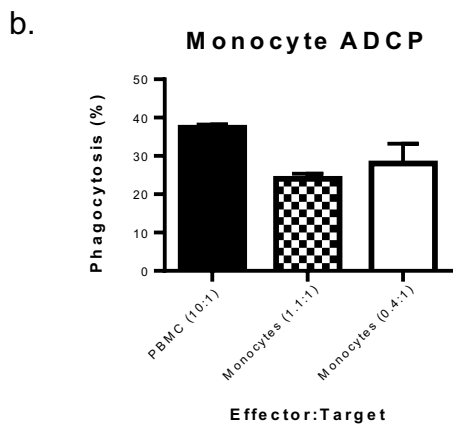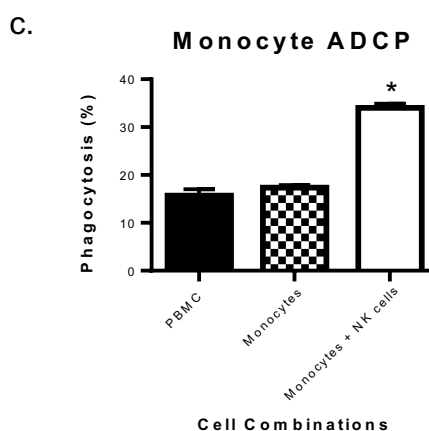

**Supplemental Figure 4.** NK cells enhance phagocytosis but are not required. PBMC, enriched monocytes and enriched NK cells co-cultured with HCC1419 and trastuzumab were evaluated for phagocytosis. Assays were performed as described for Figure 1. **a.** Flow cytometry profiles showing phagocytosis. **b.** Evaluation of phagocytosis obtained from enriched monocytes were evaluated at different effector to target ratios. The PBMC to tumor ratio is 10:1 (Within PBMC, monocytes have effector to target ratio 1.3:1). **c.** PBMC, enriched monocytes and monocytes combined with NK cells were evaluated for antibody-dependent phagocytosis. \* indicates statistical significance of  $P < 0.001$ .

a.

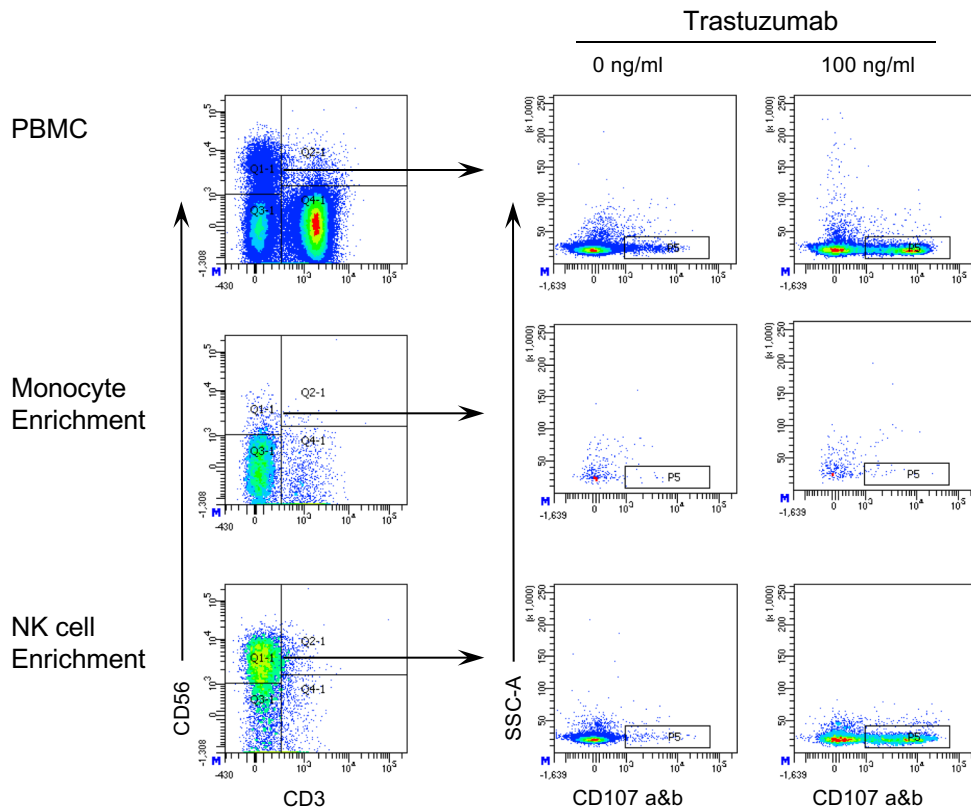

b.

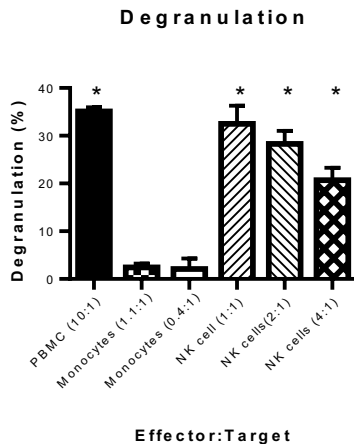

**Supplemental Figure 5.** Enriched NK cell degranulate in the presences of opsonized tumors. PBMC, enriched monocytes and enriched NK cell cells were co-cultured with tumors and trastuzumab as described in Fig 1. **a.** Flow cytometry profiles showing degranulation. **b.** Different effector to target ratios were evaluated for tumor cell death: PBMC to tumor ratio is 10:1, (Within PBMC, monocytes have an effector to target ratio of 1.3:1). Additionally there are different effector to target ratios of enriched monocytes and NK cells. \* indicates statistical significance of P<0.001.

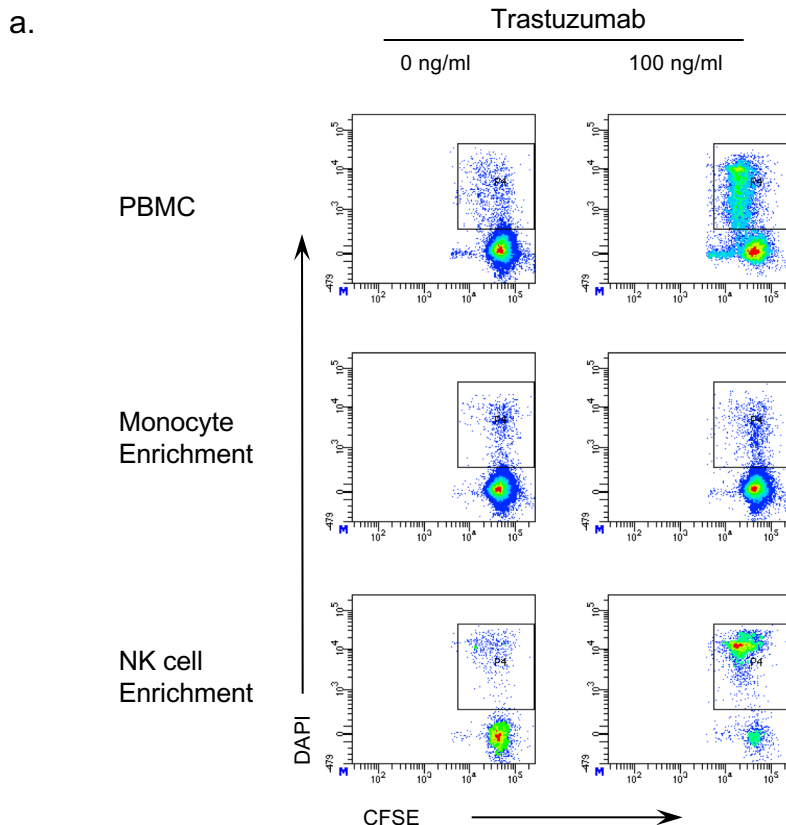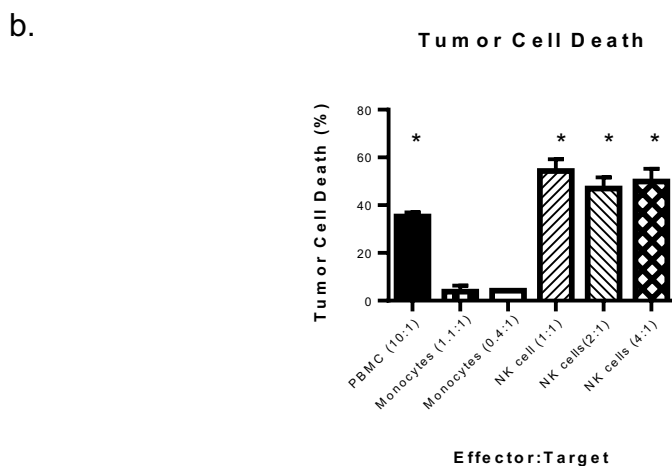

**Supplemental Figure 6.** NK cells responsible for tumor cell death. PBMC, enriched monocytes and enriched NK cells were co-cultured with HCC1419 and trastuzumab as described by Fig 1. **a.** Flow cytometry profiles showing tumor cell death. **b.** Different effector to target ratios were evaluated for tumor cell death: PBMC to tumor ratio is 10:1, (Within PBMC, monocytes have an effector to target ratio of 1.3:1). Additionally there are different effector to target ratios of enriched monocytes and enriched NK cells. \* indicates statistical significance of  $P < 0.001$ .

## Supplemental Figure 7

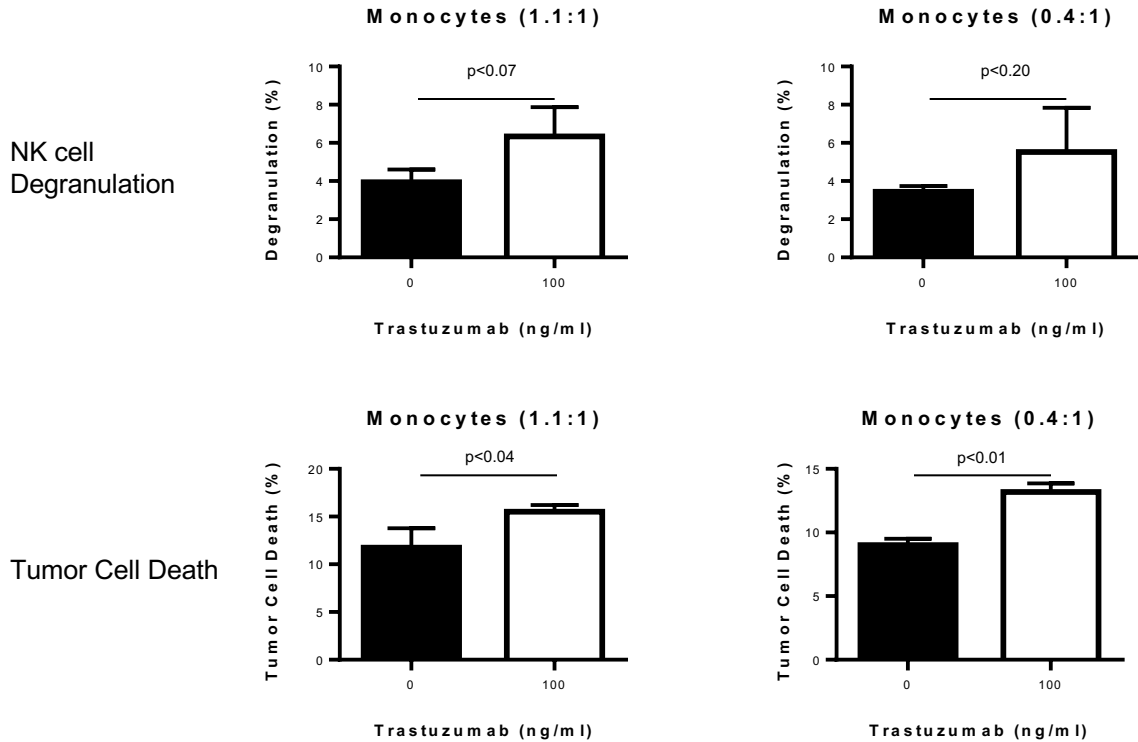

**Supplemental Figure 7.** Monocytes may contribute marginally to tumor cell death. Tumor cell death was evaluated in enriched monocytes co-cultured with HCC1419 and trastuzumab. Residual NK cell degranulation and tumor cell death were evaluated between control and trastuzumab treated cells. T tests were used to determine significance.

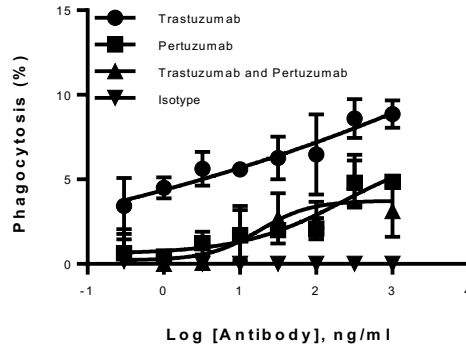

**Supplemental Figure 8.** Trastuzumab and pertuzumab fail to enhance phagocytosis of HER2 non-gene amplified tumor cells. Phagocytosis was performed as previously described in Fig. 1 using the HER2 non-gene amplified tumor T47D. Various concentration of trastuzumab, pertuzumab, trastuzumab and pertuzumab, or isotype were used to evaluate phagocytosis.

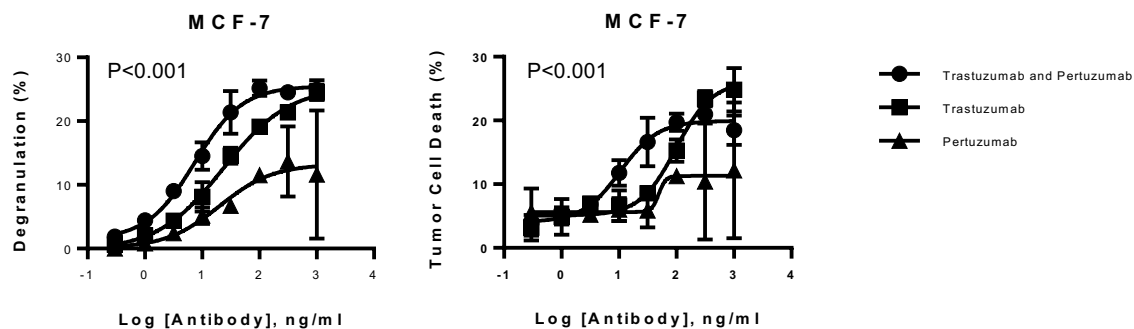

**Supplemental Figure 9.** Trastuzumab and pertuzumab enhance degranulation and tumor cell death of HER2 non-gene amplified tumors. PBMC were co-cultured with MCF-7 and various concentration of trastuzumab, pertuzumab, and trastuzumab and pertuzumab. After 4 hours, cells were evaluated for degranulation and tumor cell death by flow cytometry. Two-way ANOVA was used to determine significance.

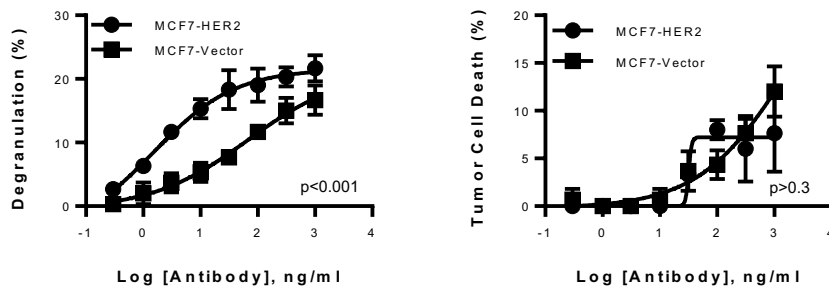

**Supplemental Figure 10.** MCF-7 HER2 enhances NK cell degranulation but little difference in tumor cell death. PBMC and MCF-7 HER2 or MCF-7 were co-cultured with various concentrations of trastuzumab. Degranulation and tumor cell death were evaluated by flow cytometry. Two-way ANOVA was used to determine significance.

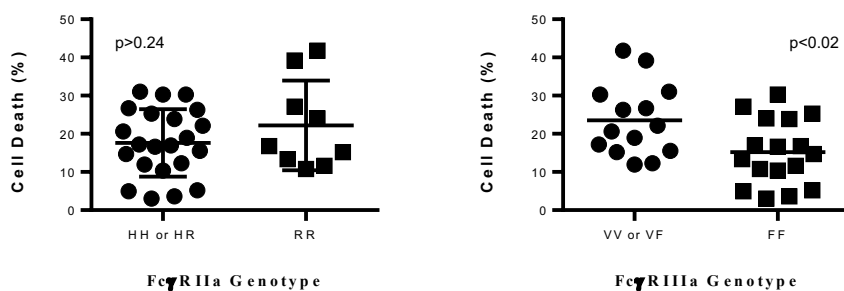

**Supplemental Figure 11.** FcγRIIIa Genotype required for enhanced NK cell activity. Genotyped PBMC were co-cultured with HCC1419 and trastuzumab and evaluated for the influence of FcγRIIa H/R alleles and FcγRIIIa V/F alleles. T tests were used to determine significance between the different alleles.
